# Supplementary material
Source: publisher figshare collection journal article supplement (https://diabetesjournals.figshare.com/articles/dataset/_/14568204)

# Supplementary Figure 1

A.

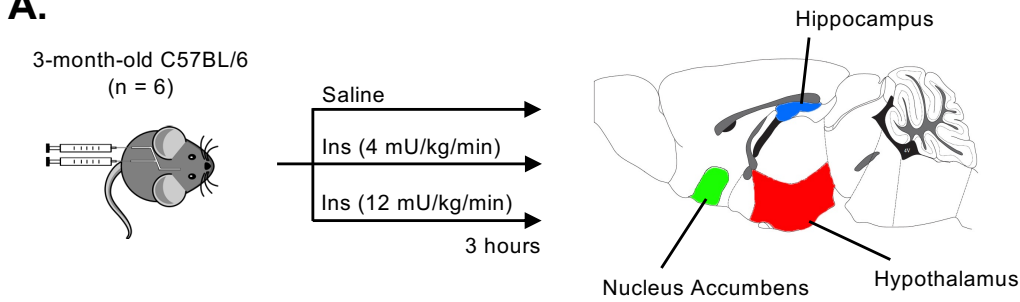

B.

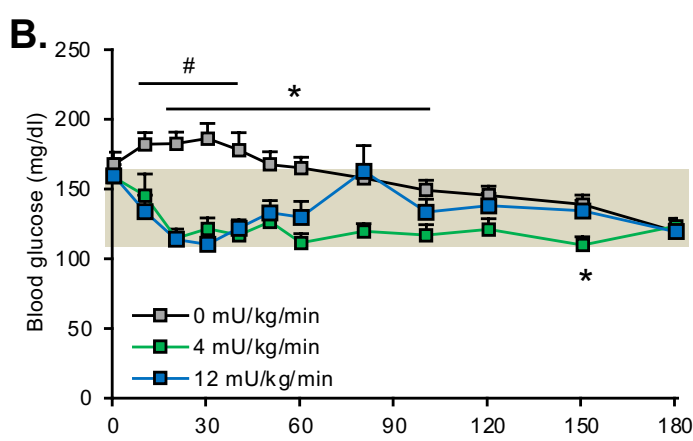

C.

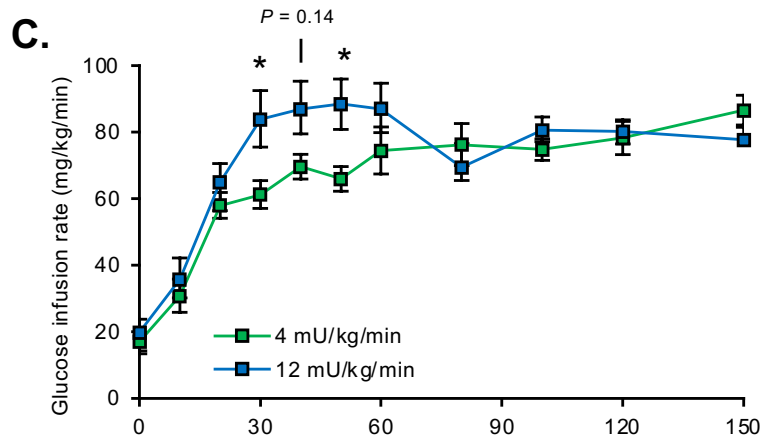

D.

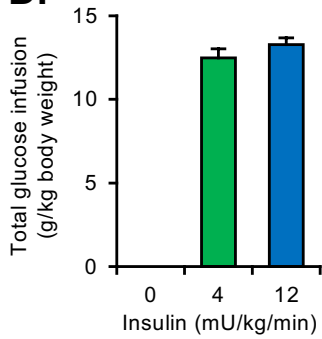

E.

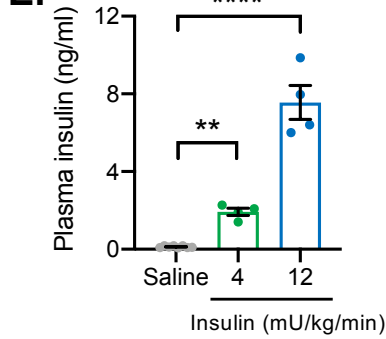

F.

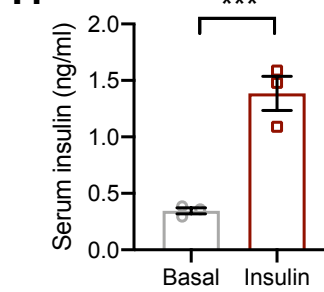

# Supplementary Figure 2

A.

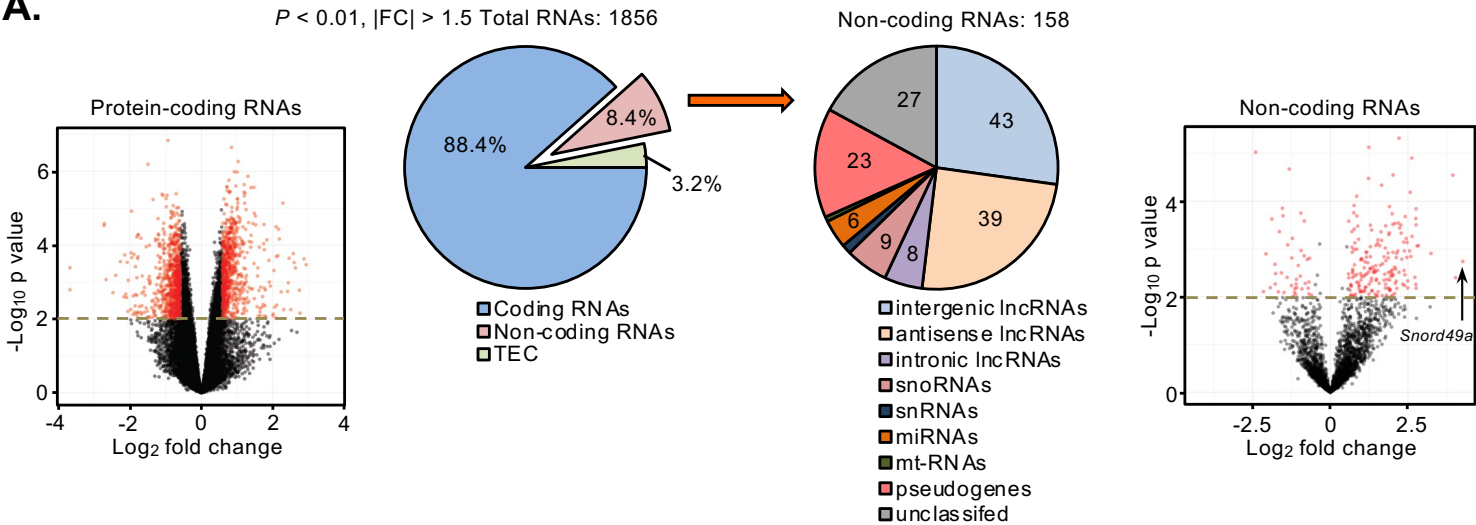

B.

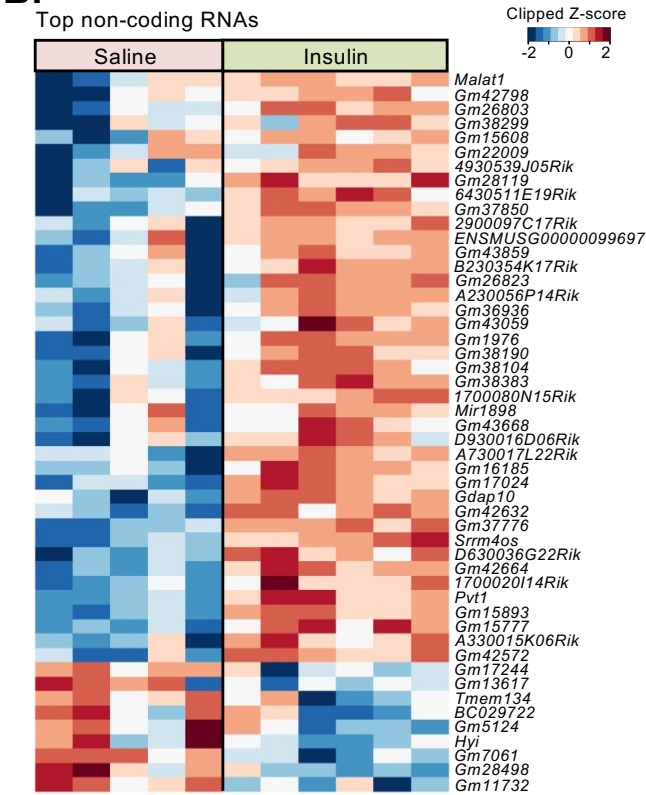

C.

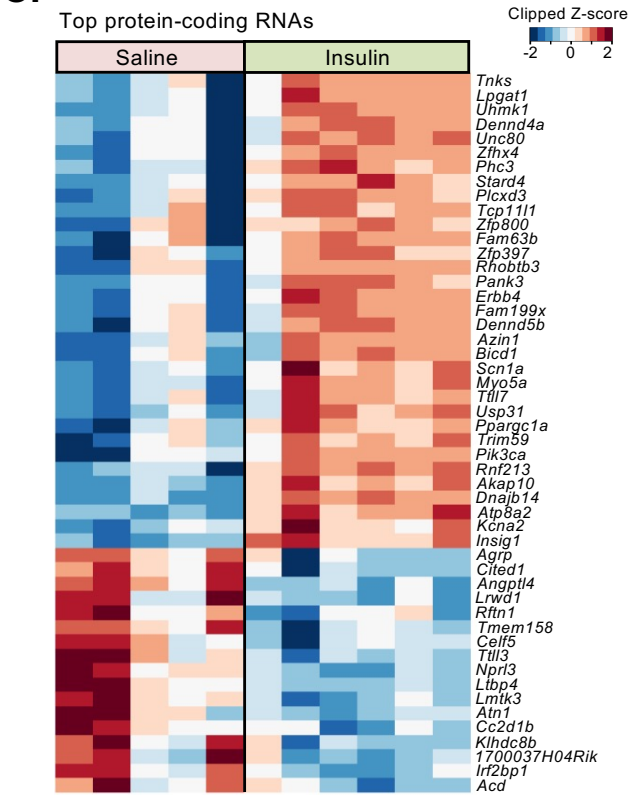

# Supplementary Figure 3

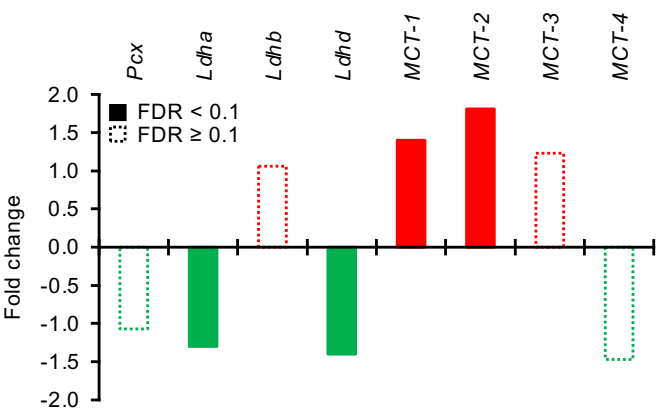

# Supplementary Figure 4

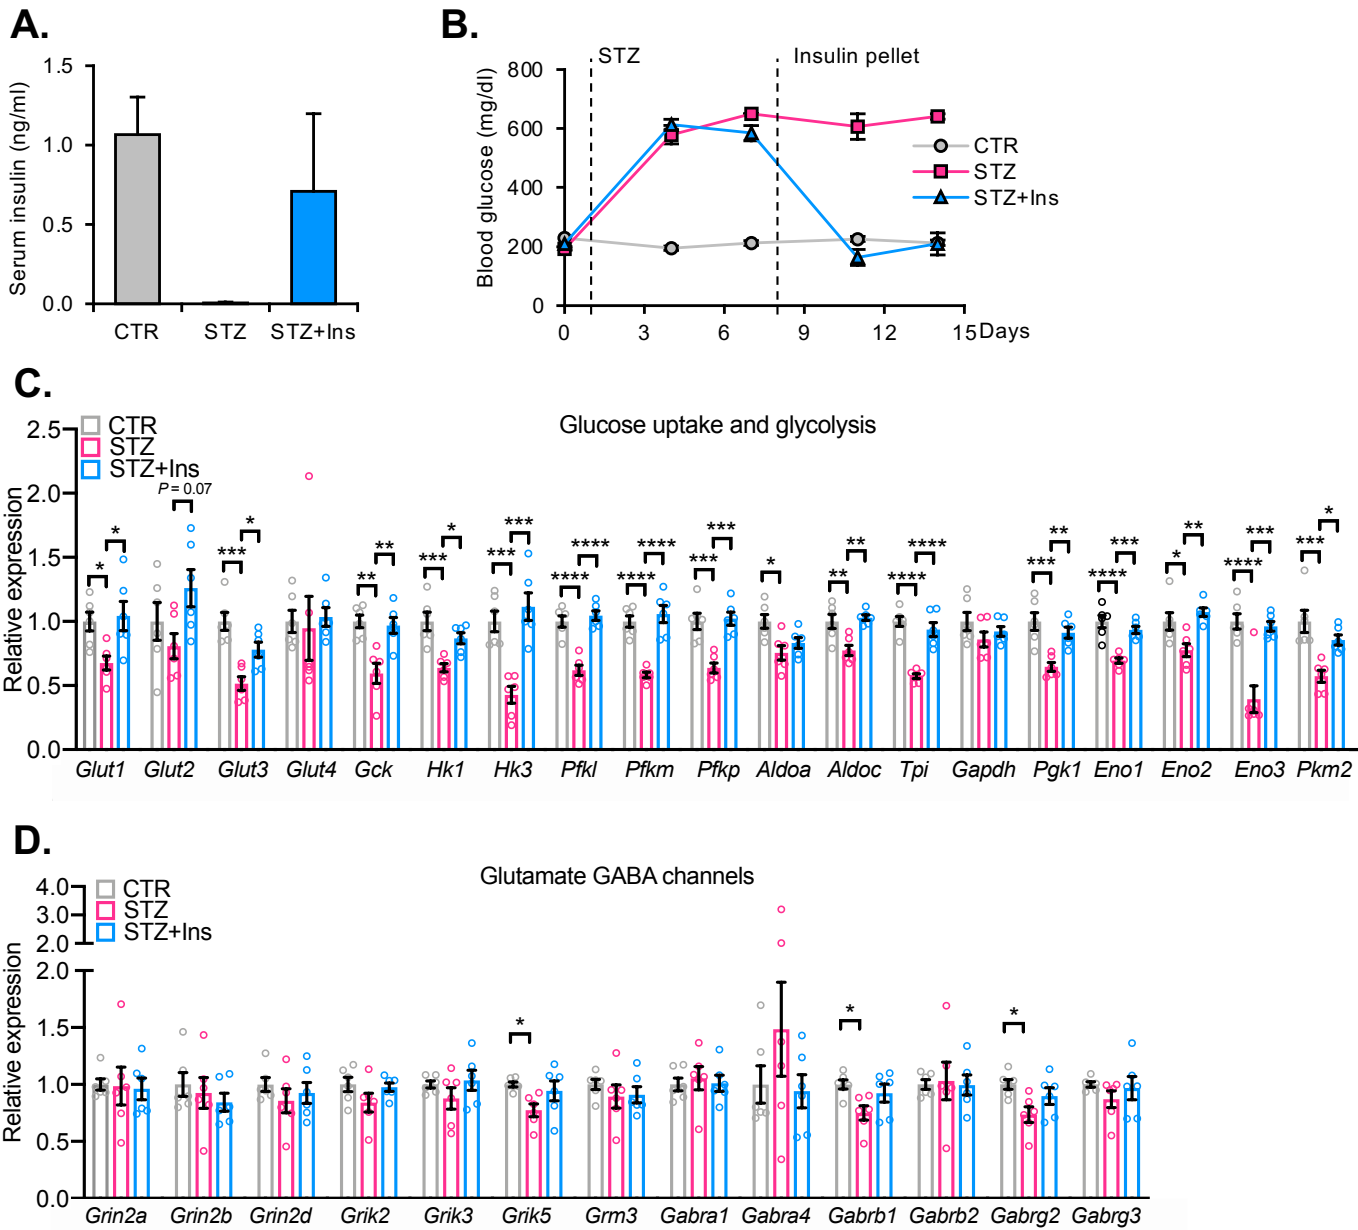

# Supplementary Figure 5

## A. Primary neurons

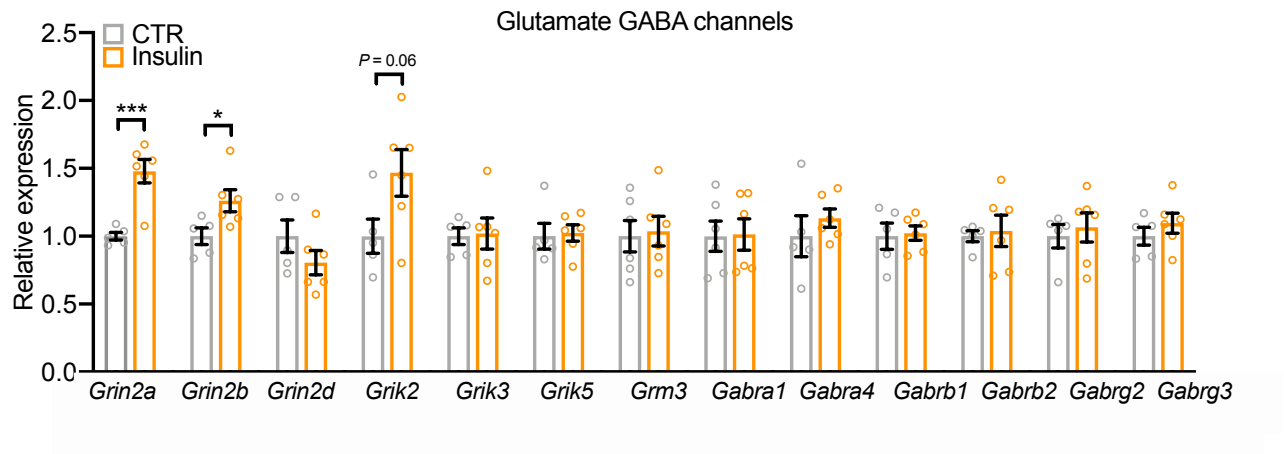

## B. Primary neurons

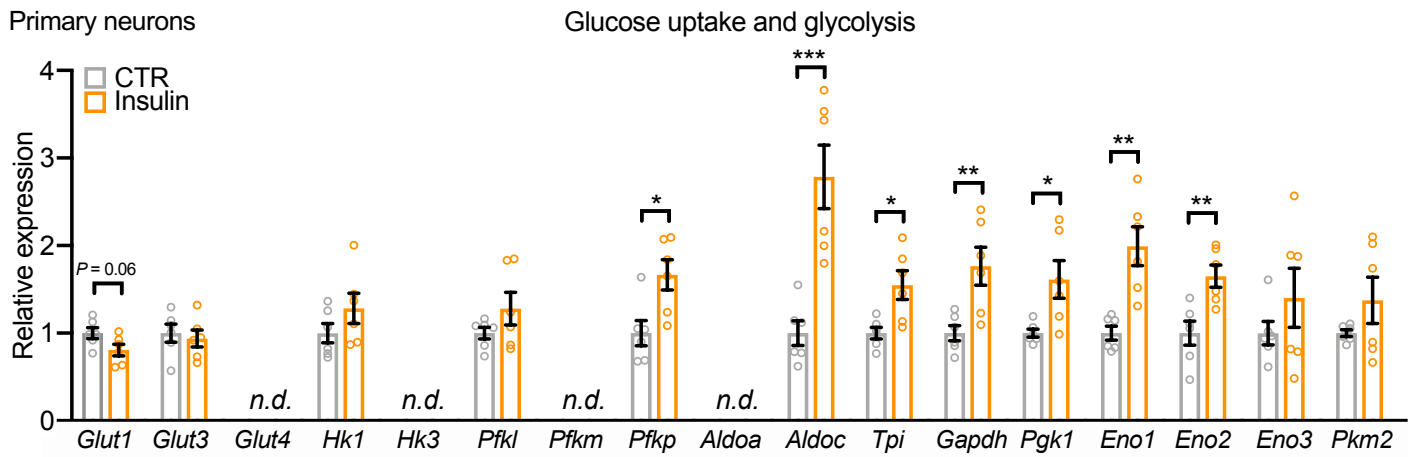

## C. Primary astrocytes

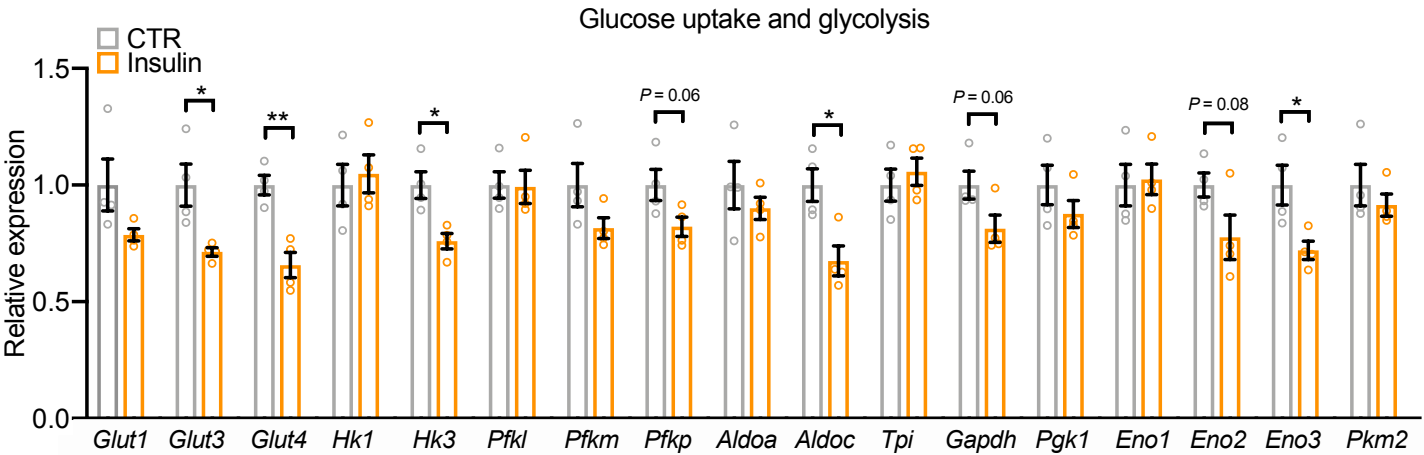

# Supplementary Figure 6

## A. Primary neurons

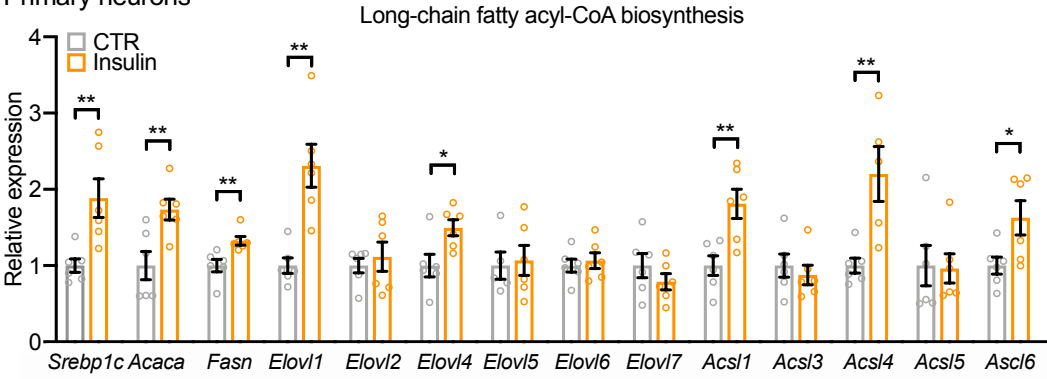

## B. Primary astrocytes

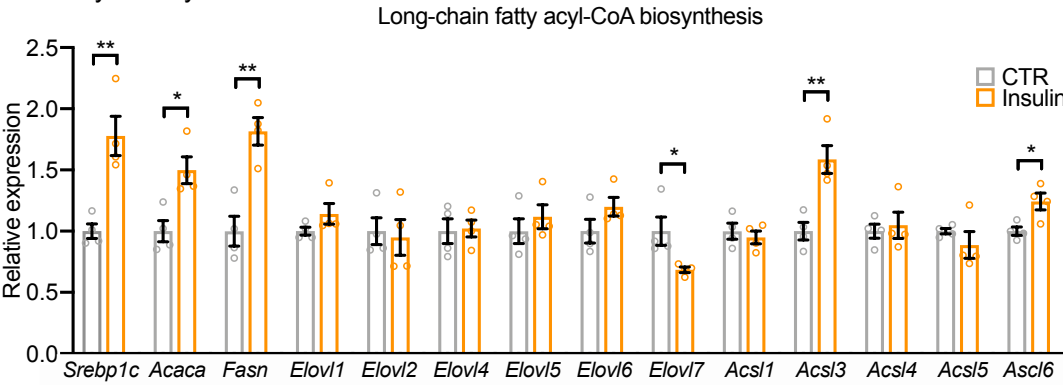

## C. Primary neurons

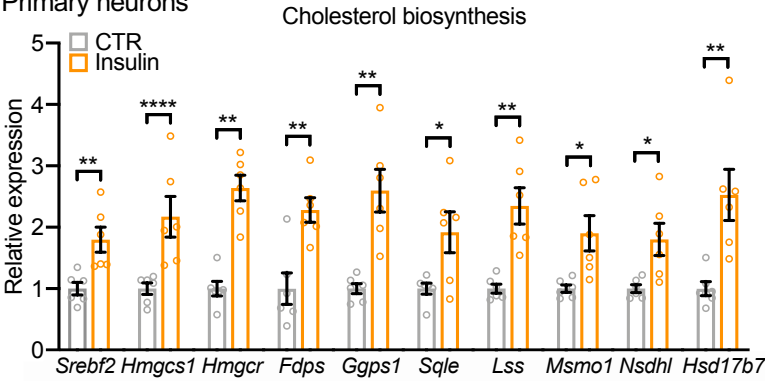

## D. Primary astrocytes

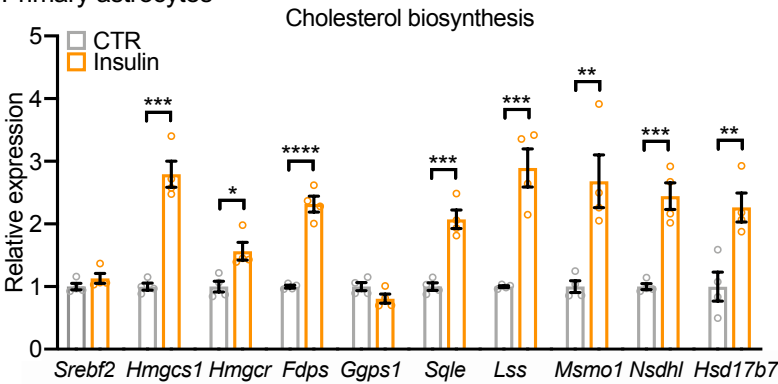

Supplement: Supplementary file 2 [file 1]
