# Supplementary material
Source: publisher figshare collection journal article supplement (https://diabetesjournals.figshare.com/articles/dataset/_/14568204)
Supplement: Supplementary file 1 [file 1]

## Supplementary Material

### Peripheral Insulin Regulates A Broad Network of Gene Expression in Brain and Hypothalamus

Weikang Cai<sup>1,2</sup>, Xuemei Zhang<sup>1</sup>, Thiago M. Batista<sup>1</sup>, Rubén García-Martín<sup>1</sup>, Samir Softic<sup>1,3</sup>,  
Guoxiao Wang<sup>1</sup>, Alfred K. Ramirez<sup>1</sup>, Masahiro Konishi<sup>1</sup>, Brian T. O'Neill<sup>1,4</sup>, Jong Hun Kim<sup>5,7</sup>,  
Jason K. Kim<sup>5,6</sup> and C. Ronald Kahn<sup>1\*</sup>

<sup>1</sup>Section of Integrative Physiology and Metabolism, Joslin Diabetes Center, Harvard Medical School, Boston, Massachusetts 02215, USA

<sup>2</sup>Department of Biomedical Sciences, New York Institute of Technology, College of Osteopathic Medicine, Old Westbury, NY 11568, USA

<sup>3</sup>Department of Pediatrics, University of Kentucky, College of Medicine, Lexington, Kentucky 40536, USA

<sup>4</sup>Division of Endocrinology and Metabolism, Fraternal Order of Eagles Diabetes Research Center, University of Iowa Carver College of Medicine, Iowa City, Iowa, USA

<sup>5</sup>Program in Molecular Medicine and <sup>6</sup>Division of Endocrinology, Metabolism, and Diabetes, Department of Medicine, University of Massachusetts Medical School, Worcester, Massachusetts 01655, USA

<sup>7</sup>Department of Food Science and Biotechnology, Sungshin University, South Korea

\*To whom correspondence may be addressed:

C. Ronald Kahn, MD  
Joslin Diabetes Center  
One Joslin Place  
Boston, MA 02215, USA  
Phone (617) 309-2635  
e-mail: [c.ronald.kahn@joslin.harvard.edu](mailto:c.ronald.kahn@joslin.harvard.edu)

## Supplementary Figure Legends

### Supplementary Figure 1: Physiological data of mice undergoing euglycemic clamps with

**indicated doses of insulin infusion. A,** Schematic of euglycemic clamps and brain tissue collection. Male C56BL/6J mice were infused with either saline, 4 and 12 mU/kg/min insulin for 3 h with glucose levels clamped at euglycemia (33). **B,** Blood glucose levels of mice at indicated time points during the clamps.  $N = 6$ . \*,  $P < 0.05$ , saline vs 4 mU/kg/min insulin; #,  $P < 0.05$ , saline vs 12 mU/kg/min insulin. Repeated-measures 2-way ANOVA followed by Tukey's multiple comparisons. **C,** Glucose infusion rates of low and high insulin-infused groups at indicated time points during the clamps.  $N = 6$ . \*,  $P < 0.05$ . Repeated-measures 2-way ANOVA followed by Sidak's multiple comparisons. **D,** Total glucose infused during the clamps. Student's  $t$ -test was performed between low- and high-insulin infused groups,  $N = 6$ . **E,** Plasma insulin levels of 4 mice randomly selected from each group following 3 h insulin clamps.  $N = 4$ . One-way ANOVA followed by Tukey's multiple comparison test. \*\*,  $P < 0.01$ ; \*\*\*\*,  $P < 0.0001$ . **F,** Serum insulin levels of male C56BL/6J mice at basal or 5 min after i.p. glucose injection (3g/kg).  $N = 3$ . Student's  $t$ -test. \*\*\*,  $P < 0.001$ . Data are shown as mean  $\pm$  s.e.m.

### Supplementary Figure 2. Insulin triggers robust transcriptional regulation of both protein

**coding and non-coding RNAs in the hypothalamus. A,** Pie chart showing the percentages of significantly regulated protein-coding and non-coding RNAs by low-dose insulin in the hypothalamus ( $P < 0.01$ ,  $|FC| > 1.5$ ). Volcano plot showing the regulation of the coding and non-coding RNAs by low-dose insulin infusion. *Red* indicates significantly regulated non-coding RNAs ( $P < 0.01$ ,  $|FC| > 1.5$ ). **B,** Heatmap of top 50 non-coding RNAs regulated by low-dose insulin. **C,** Heatmap of top 50 protein-coding RNAs regulated by low-dose insulin.

### Supplementary Figure 3. Regulation of pyruvate carboxylase, lactate dehydrogenases

**and monocarboxylate transporters by insulin.** Regulation of pyruvate carboxylase, lactate

dehydrogenases and monocarboxylate transporters by low dose insulin. Upregulation of genes is represented by fold change (Insulin/Saline). Suppression of genes is represented by – fold change (Saline/Insulin). Solid bars indicate  $FDR < 0.1$ ; open dashed bars indicate  $FDR \geq 0.1$ .

**Supplementary Figure 4. Expression of genes related to glycolysis, glutamate receptors**

**and GABA receptors in mouse model of insulin deficiency.** **A**, Serum insulin levels of mice received citrate buffer alone as controls, mice injected with 150 mg/kg streptozotocin (STZ), or mice with subcutaneous insulin pellet treatment 14 days after initial injections. **B**, Blood glucose levels of mice control and STZ diabetic mice, followed by insulin pellet treatment or left untreated. **C**, Relative mRNA expression of genes involved in glucose uptake and glycolysis in the hypothalamus of control, STZ and STZ+Insulin groups. *Tbp* was used as internal control.  $N = 6$ . **D**, Relative mRNA expression of the subunits of ionotropic and metabotropic glutamate and GABA receptors in the hypothalamus of control, STZ and STZ+Insulin groups. *Tbp* was used as internal control.  $N = 6$ . One-way ANOVA followed by Tukey's multiple comparison test. \*,  $P < 0.05$ ; \*\*,  $P < 0.01$ ; \*\*\*,  $P < 0.001$ ; \*\*\*\*,  $P < 0.0001$ . Data are shown as mean  $\pm$  s.e.m.

**Supplementary Figure 5. Transcriptional regulation of the genes involved in**

**neurotransmitter receptors, glucose uptake and glycolysis in primary cultured neurons**

**and astrocytes.** **A**, Relative mRNA expression of the subunits of ionotropic and metabotropic glutamate and GABA receptors in primary neuron cultures stimulated with 100 nM insulin for 3 h. *Tbp* was used as internal control.  $N = 6$ . **B**, Relative mRNA expression of genes involved in glucose uptake and glycolysis in primary cultured neurons in response to 100 nM insulin stimulation for 3 h. *Tbp* was used as internal control.  $N = 6$ . **C**, Relative mRNA expression of genes involved in glucose uptake and glycolysis in primary cultured astrocytes in response to

100 nM insulin stimulation for 6 h. *Tbp* was used as internal control.  $N = 4$ . Student's *t*-test. \*,  $P < 0.05$ ; \*\*,  $P < 0.01$ ; \*\*\*,  $P < 0.001$ . Data are shown as mean  $\pm$  s.e.m.

**Supplementary Figure 6. Transcriptional regulation of the genes involved in long-chain fatty acyl-CoA and cholesterol biosynthesis in primary cultured neurons and astrocytes.**

**A and B**, Relative mRNA expression of genes involved in long-chain fatty acyl-CoA biosynthesis in primary cultured neurons (**A**) and astrocytes (**B**) in response to 100 nM insulin stimulation for 3 h (neurons) or 6 h (astrocytes). **C and D**, Relative mRNA expression of genes involved in de novo cholesterol biosynthesis in primary cultured neurons (**C**) and astrocytes (**D**) in response to 100 nM insulin stimulation for 3 h (neurons) or 6 h (astrocytes). *Tbp* was used as internal control.  $N = 6$  for neurons.  $N = 4$  for astrocytes. Student's *t*-test. \*,  $P < 0.05$ ; \*\*,  $P < 0.01$ ; \*\*\*,  $P < 0.001$ ; \*\*\*\*,  $P < 0.0001$ . Data are shown as mean  $\pm$  s.e.m.
